# Supplementary material for: Formation of linear and hyperbranched porphyrin polymers on carbon nanotubes via a CuAAC “grafting from” approach
Source: Royal Society of Chemistry journal article supplement (doi:10.1039/c2jm33714b), 2012-01-01
Supplement: c2jm33714b.pdf [file c2jm33714b.pdf]

## **Formation of Linear and Hyperbranched Porphyrin Polymers onto Carbon Nanotubes *via* CuAAC “*Grafting from*” Approach**

Ismail Hijazi,<sup>a</sup> Bruno Jousselme,<sup>b</sup> Pascale Jégou,<sup>b</sup> Arianna Filoramo<sup>a</sup> and Stéphane Campidelli\*<sup>a</sup>

<sup>a</sup> CEA Saclay, IRAMIS, Service de Physique de l'Etat Condensé (URA CNRS 2464), Laboratoire d'Electronique Moléculaire, F-91191 Gif sur Yvette, France. Fax: +33 (0)1 69 08 66 40; Tel: +33 (0)1 69 08 88 77; E-mail: stephane.campidelli@cea.fr

<sup>b</sup> CEA Saclay, IRAMIS, Service de Physique et Chimie des Surfaces et Interfaces, Laboratoire de Chimie des Surfaces et Interfaces, F-91191 Gif sur Yvette, France.

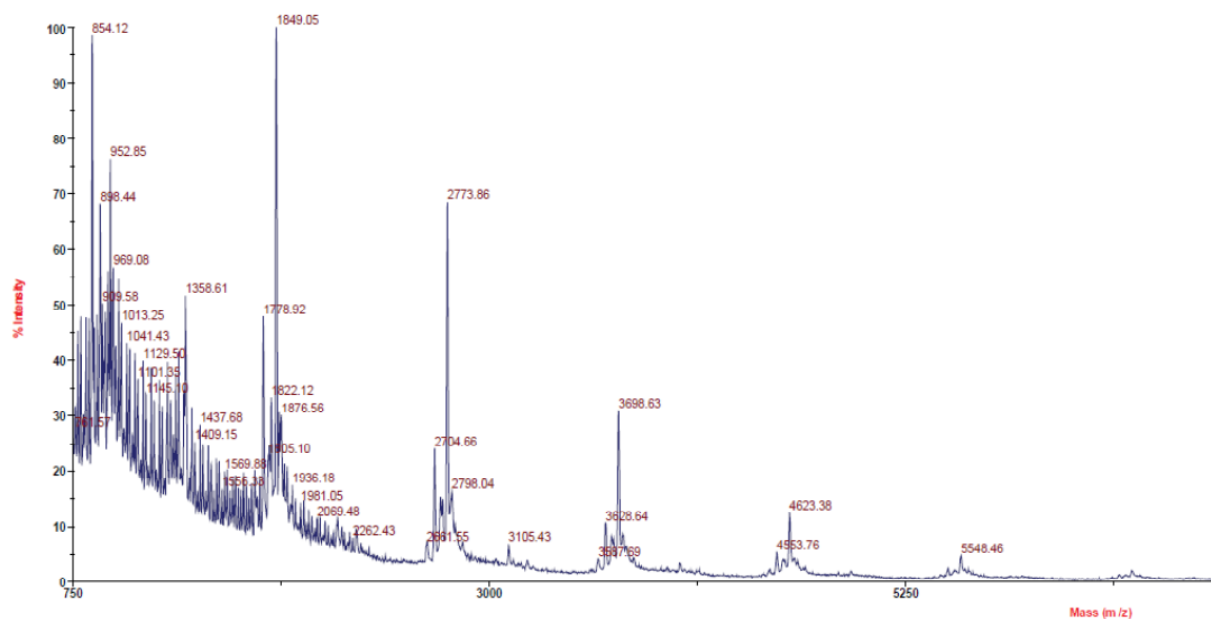

**Fig. S1** Mass spectrum of the porphyrin oligomers obtained in the filtrate of the reaction of SWNT **3** with porphyrin **2**. The peaks at: 1849.05 corresponds to the porphyrin dimer (Exact mass 1846.44); 2773.86 corresponds to the porphyrin trimer (Exact mass 2769.66); 3696.63 corresponds to the porphyrin tetramer (Exact mass 3692.88); 4623.36 corresponds to the porphyrin pentamer (Exact mass 4616.10); 5548.46 corresponds to the porphyrin hexamer (Exact mass 5539.32).
